# Supplementary material
Source: PubMed Central journal article supplement (PMC3677463)
Supplement: 1307473110_pnas.201307473SI.pdf [file 1307473110_pnas.201307473SI.pdf]

# Supporting Information

Yang et al. 10.1073/pnas.1307473110

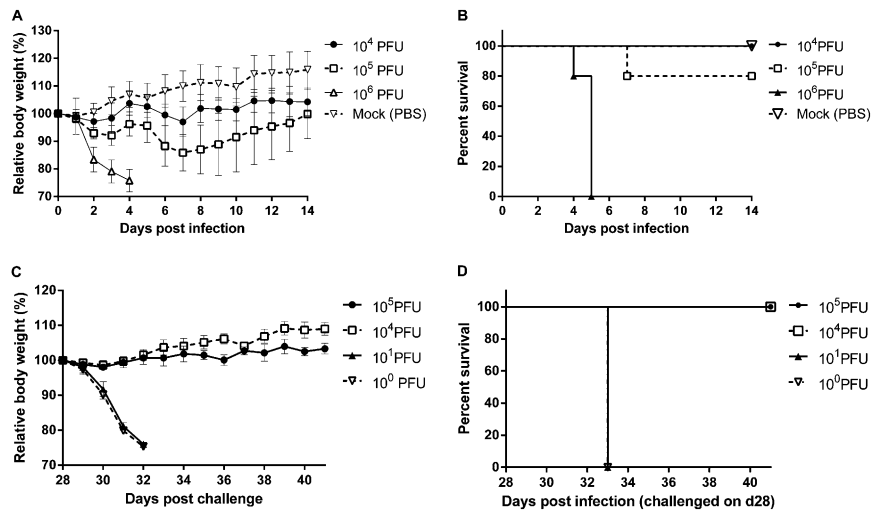

**Fig. S1.** LD<sub>50</sub> and median protective dose (PD<sub>50</sub>) values of neuraminidase (NA) with minimal gene expression variant (NA<sup>Min</sup>) in mice. (A and B) Groups of five male BALB/c mice were infected intranasally with different doses of NA<sup>Min</sup>. Relative body weight (A) and survival rate (B) were monitored for 14 d. The calculated LD<sub>50</sub> was  $2.4 \times 10^5$  plaque-forming units (PFU). (C and D) Groups of five male mice were vaccinated intranasally with different doses of NA<sup>Min</sup> variant. At 28 d p.i., mice were challenged with  $10^5$  PFU of WT influenza A/PR/8/34 (PR8), and their relative body weight (C) and survival rate (D) were monitored for 14 d. Error bars represent SD.

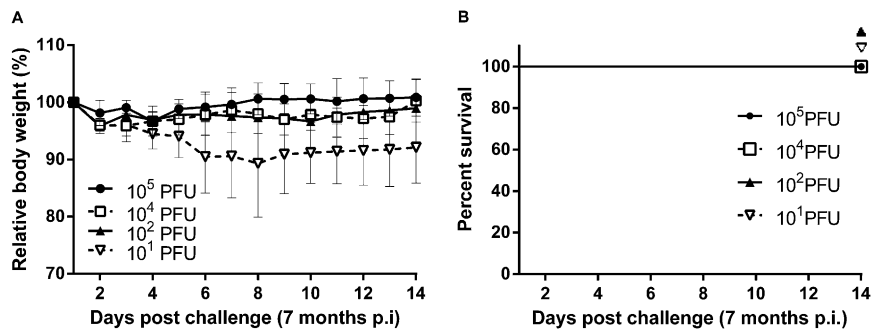

**Fig. S2.** Long-term protection of NA and hemagglutinin (HA) with minimal gene expression (NA+HA)<sup>Min</sup>-vaccinated mice. Groups of five BALB/c mice (5-6 wk old) were intranasally vaccinated with (NA+HA)<sup>Min</sup> at different doses. After 7 mo, the mice were challenged with  $10^5$  PFU of WT PR8, and body weight (A) and survival rate (B) were monitored for 14 d. Error bars represent SD.
